# **Patterns and Causes of Signed Linkage Disequilibria in Flies and Plants**

**George Sandler<sup>1</sup>, Stephen I. Wright<sup>1,2\*</sup>, Aneil F. Agrawal<sup>1,2\*</sup>**

<sup>1</sup>Department of Ecology and Evolutionary Biology, University of Toronto, 25 Willcocks Street, Toronto, ON M5S 3B2, Canada; <sup>2</sup>Center for Analysis of Genome Evolution and Function, University of Toronto, 25 Willcocks Street, Toronto, ON M5S 3B2, Canada

\*These authors made equal contributions.

**Corresponding author**

**George Sandler**

**Email: [george.sandler@mail.utoronto.ca](mailto:george.sandler@mail.utoronto.ca)**

## 1 **Abstract**

2 Most empirical studies of linkage disequilibrium (LD) study its magnitude, ignoring its  
3 sign. Here, we examine patterns of signed LD in two population genomic datasets, one  
4 from *Capsella grandiflora* and one from *Drosophila melanogaster*. We consider how  
5 processes such as drift, admixture, Hill-Robertson interference, and epistasis may  
6 contribute to these patterns. We report that most types of mutations exhibit positive LD,  
7 particularly, if they are predicted to be less deleterious. We show with simulations that  
8 this pattern arises easily in a model of admixture or distance biased mating, and that  
9 genome-wide differences across site types are generally expected due to differences in  
10 the strength of purifying selection even in the absence of epistasis. We further explore  
11 how signed LD decays on a finer scale, showing that loss of function mutations exhibit  
12 particularly positive LD across short distances, a pattern consistent with intragenic  
13 antagonistic epistasis. Controlling for genomic distance, signed LD in *C. grandiflora*  
14 decays faster within genes, compared to between genes, likely a by-product of frequent  
15 recombination in gene promoters known to occur in plant genomes. Finally, we use  
16 information from published biological networks to explore whether there is evidence for  
17 negative synergistic epistasis between interacting radical missense mutations. In *D.*  
18 *melanogaster* networks, we find a modest but significant enrichment of negative LD,  
19 consistent with the possibility of intra-network negative synergistic epistasis.

20

## 21 Introduction

22 Linkage disequilibrium (LD), the association of different alleles across the genome, is a  
23 general feature of population genomic datasets, often revealing clues of ongoing  
24 evolutionary or demographic processes (McEvoy et al. 2011). For example, in finite  
25 populations, drift can be a ready source of LD, generating both positive and negative  
26 associations between alleles (Hill and Robertson 1968). While unsigned LD has been  
27 extensively studied in population genetics (through statistics such as  $r^2$ ), signed LD has  
28 received relatively less attention, despite the fact that the sign of allelic associations can  
29 also provide useful information. Here we refer to positive associations as those between  
30 two common alleles (or equivalently between two rare alleles), and negative  
31 associations as those between common and rare alleles. Demographic processes such  
32 as admixture and population structure can create LD, where unlike drift in a single  
33 panmictic population, an overabundance of positive associations is expected between  
34 pairs of migrant alleles (Chakraborty and Weiss 1988; Stephens et al. 1994; Pfaff et al.  
35 2001). Selective processes can also be a source of LD; for example, ongoing strong  
36 selective sweeps can be characterised by an elevation of unsigned LD around the  
37 sweeping haplotype (McVean 2007). Non-independence of mutational events, e.g.  
38 multinucleotide mutations, arise at non-negligible frequencies in several species  
39 (Schrider et al. 2011), and could also be an important source of positive LD among de-  
40 novo mutations (Ragsdale 2021). Finally, unsigned LD can also be used to analyze  
41 patterns of recombination across the genome, as recombination is expected to break  
42 down any existing LD (Auton and McVean 2007).

43 LD can also build up due to selection against deleterious mutations in two  
44 different ways. First, Hill Robertson interference (resulting from the interaction of  
45 selection and drift) can cause negative associations to build up among deleterious  
46 mutations, if recombination between them is limited (Hill and Robertson 1966). In  
47 sexually reproducing organisms such as humans, this process has recently been  
48 suggested to build up negative LD among physically proximal, missense mutations  
49 (Garcia and Lohmueller 2020). Second, negative selection can cause LD among  
50 deleterious mutations to build up if epistasis is present (Kondrashov 1995; Sohail et al.

51 2017). Under the null model of multiplicative fitness, where each mutation contributes to  
52 a reduction in fitness independently of other mutations, LD is not expected to  
53 accumulate. Synergistic epistasis, where each additional deleterious mutation reduces  
54 fitness by a greater magnitude, creates negative LD among deleterious mutations and  
55 vice versa for antagonistic epistasis (Kimura and Maruyama 1966; Kondrashov 1982).

56 Synergistic epistasis among deleterious mutations is of particular interest  
57 because such epistasis has several evolutionary consequences. For example, negative  
58 synergistic epistasis allows for lower mutation loads under mutation-selection balance,  
59 and can influence the evolution of sex and recombination (Kimura and Maruyama 1966;  
60 Crow and Kimura 1970; Crow and Kimura 1979; Kondrashov 1982; see also Barton  
61 1995). Despite considerable interest, empirical data on epistasis among deleterious  
62 mutations is limited with most data coming from microorganisms assayed in a lab  
63 setting. These studies have found that synergistic and antagonistic interactions are both  
64 common so that mean epistasis is close to zero (Elena and Lenski 1997; Agrawal and  
65 Whitlock 2010; Lalić and Elena 2012; Bank et al. 2015; Puchta et al. 2016). A recent  
66 study by Sohail et al. (2017) used a different approach to make inferences about  
67 epistasis. They examined patterns of signed LD among rare loss of function (LOF)  
68 mutations in humans and fruit flies demonstrating that across several datasets LOF  
69 mutations had significantly lower values of signed LD than their neutral reference  
70 (synonymous sites), a pattern consistent with the action of negative synergistic  
71 epistasis.

72 Here we examine patterns of LD across several classes of mutations in a  
73 published dataset of 182 individuals of *Capsella grandiflora* sampled from a population  
74 in Greece, and 191 *Drosophila melanogaster* flies sampled from an ancestral population  
75 in Zambia (Lack et al. 2015). We find that mean signed LD is positive for most types of  
76 mutations across the genome except for LOF mutations. The magnitude of positive LD  
77 scales with the predicted deleteriousness of the mutations we analyze, with more  
78 neutral mutations exhibiting the most positive LD. We use simulations to show that  
79 admixture or distance biased mating could produce this type of pattern and provide  
80 alternative explanations to epistasis for differences in LD among neutral versus

81 deleterious mutations. We then explore finer scale patterns of LD and uncover strong  
82 short-scale positive LD among LOF mutations, a potential signal of within gene  
83 antagonistic epistasis. Further analyses show that within gene LD is generally stronger  
84 than between gene LD in *C. grandiflora* (correcting for distance between pairs of  
85 mutations), for both neutral and deleterious mutations. This pattern is broadly consistent  
86 with cross-over hotspots frequently occurring in promoter regions of plant genomes.  
87 Finally, we use gene network information from KEGG to explore signals of LD and  
88 epistasis among deleterious mutations segregating in functionally related genes. We  
89 report no significant LD in *C. grandiflora* but significantly more negative LD in *D.*  
90 *melanogaster* KEGG networks compared to a null distribution generated from permuted  
91 networks, a pattern that could indicate synergistic epistasis acting against gene flow.

92

## 93 **Results**

94 We analyzed patterns of signed LD among several classes of mutations (synonymous,  
95 missense non-radical, missense radical, intronic, non-coding, UTR (untranslated  
96 region), and LOF), in a dataset of 182 outbred diploid *C. grandiflora* individuals, and a  
97 dataset of 191 *D. melanogaster* haploid embryos (population DPGP3). We only  
98 considered variants below a specified threshold for minor allele frequency because we  
99 hoped to maximize the probability that the rare variants at each site are deleterious,  
100 though the degree of that deleteriousness is expected to vary among mutational classes  
101 (e.g., for synonymous sites, rare variants are presumably negligibly more deleterious  
102 than the common variant on average). The sign of LD was polarized by frequency so  
103 positive/negative LD should indicate that deleterious variants are found more/less often  
104 together than expected.

105 We first measured mean LD by assessing the over- or under-dispersion of  
106 deleterious (or synonymous) variants among individual genomes (see Materials and  
107 Methods; (Sohail et al. 2017)). An under-dispersion of the deleterious variants implies  
108 negative LD (i.e., deleterious variants are found together less often than expected by  
109 chance). We calculated mean LD per pair of alleles using several different allelic count  
110 cut-offs (i.e., minor allele frequency thresholds). In both species, point estimates for

111 mean LD were positive for all classes of mutations, and all allelic count cut-offs  
112 examined, except LOF mutations (Figure 1), where the point estimate for mean LD was  
113 negative using some allelic count cut-offs but not others. When repeating this analysis  
114 in *D. melanogaster*, excluding regions which were known to harbor inversions in the  
115 DPGP3 population, we found the same qualitative results albeit with slightly reduced  
116 positive LD for most mutations classes (Supplementary Figure 1).

117 One pattern apparent in our data is that the least deleterious mutational classes  
118 exhibited the most positive mean LD in both flies and plants (i.e., the most positive LD  
119 belonged to classes such as intronic and synonymous). The site frequency spectra for  
120 these different mutational classes add support to the suspected rank ordering in the  
121 deleteriousness of different mutational classes (Supplementary Figure 2) such that the  
122 classes with the greatest excess of rare variants (presumed to be the most deleterious)  
123 had the more positive LD. In *D. melanogaster* the order of deleteriousness inferred from  
124 the site frequency spectra (starting with least deleterious) was as follows: synonymous,  
125 non-coding, intronic, UTR, missense non-radical, missense radical, LOF. Similarly, in *C.*  
126 *grandiflora* the order was synonymous, intronic, UTR, non-coding, missense non-  
127 radical, missense radical, LOF (Supplementary Figure 2).

128

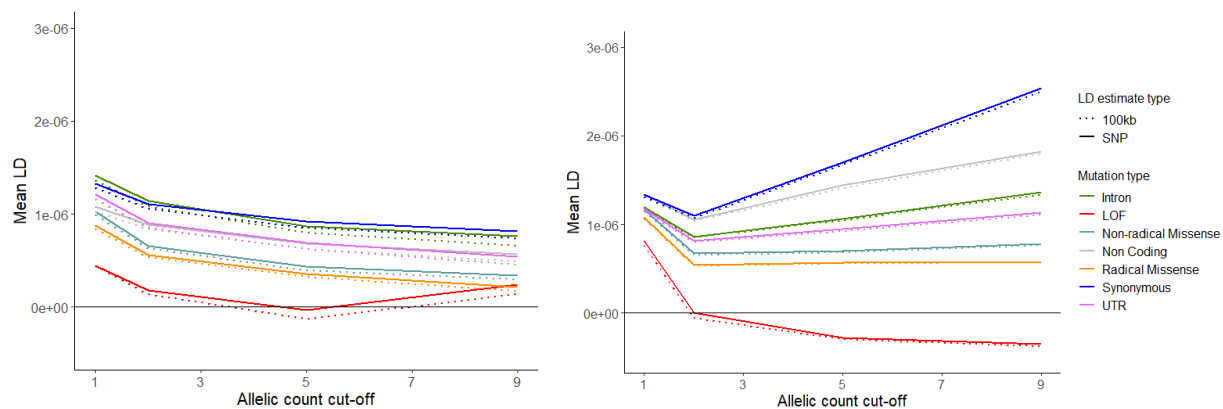

129

130 Figure 1. Mean pair-wise LD among several classes of mutations across different allele count cut-offs.  
131 Solid lines indicate mean LD among all SNPs, dashed lines indicate LD calculated among sites in  
132 different 100kb, non-overlapping genomic blocks. Left, results for *C. grandiflora*, right, results for *D.*  
133 *melanogaster*.

134           The observation that LD was strongest for neutral/nearly neutral mutations  
135 suggests a non-selective force, such as admixture, is building LD (Sohail et al. 2017;  
136 but see also Good 2020). We used a series of simulations using SLiM (V3.2.1) (Haller  
137 and Messer 2019) to explore how different cases of non-equilibrium demography and  
138 population structure can affect LD among neutral and deleterious mutations (see  
139 Materials and Methods for more details). We first tested how a model of admixture  
140 might impact patterns of LD for rare neutral and deleterious mutations under strictly  
141 multiplicative selection. We simulated admixture between a focal population and two  
142 previously isolated satellite populations and polarized LD by variant rarity. We found  
143 that admixture easily caused positive LD to build up among neutral mutations,  
144 particularly so if admixture started recently between populations that had previously  
145 been isolated (Figure 2A). However, this was not the case for deleterious mutations in  
146 these populations, where LD remained much closer to 0 albeit slightly positive on  
147 average if admixture was present. This result was also apparent if we polarized LD by  
148 true ancestral state in our simulations and imposed a minor allele frequency cut-off, or if  
149 we polarized by frequency as in our real-world data, but did not implement a minor allele  
150 frequency cut-off (Supplementary Figure 3). The only case where we did not observe  
151 positive LD for neutral mutations was if we polarized LD by true ancestral state and  
152 implemented no allele frequency cut-off (Supplementary Figure 3).

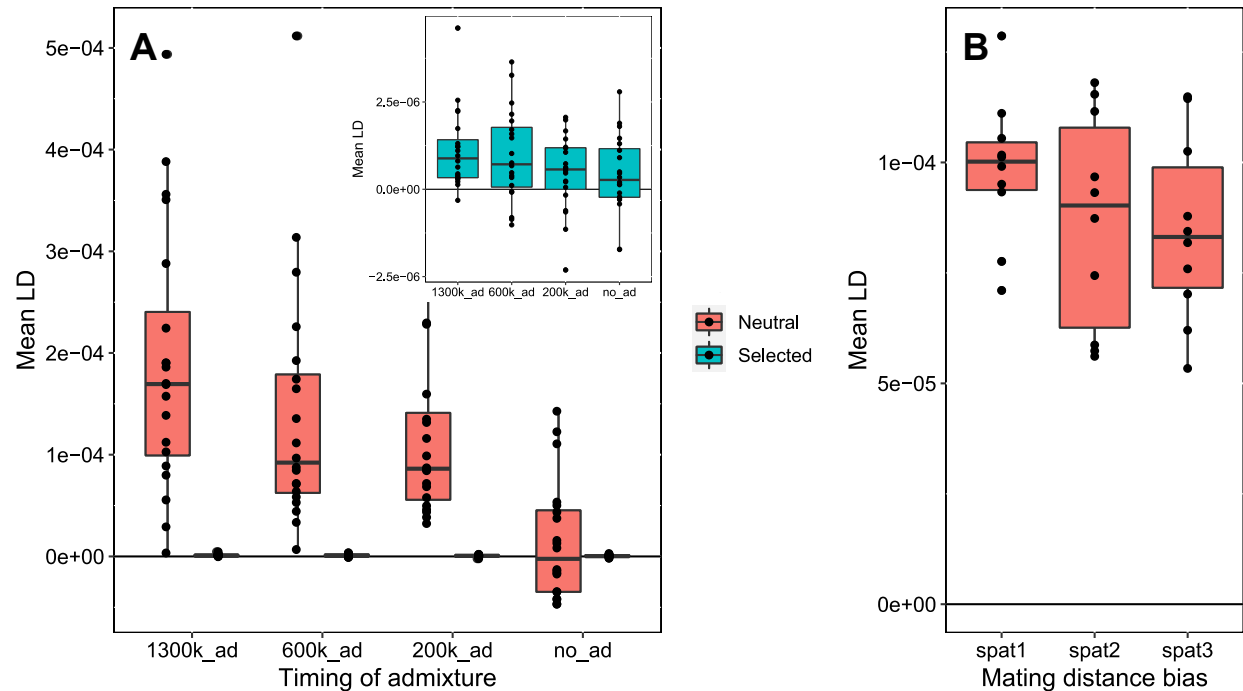

153

154

155

156

157

158

159

160

161

162

163

164

165

166

167

168

169

170

Figure 2. A) Mean signed LD among simulated neutral and deleterious mutations under different scenarios of admixture. The  $x$ -axis represents the generation in which admixture between isolated populations started. All simulations were run of a total of 1.5 million generations. Inset highlights results for selected (deleterious) mutations B) Mean LD among neutral mutations segregating in simulated populations existing on a 2D geographic landscape. The  $x$ -axis represents different scenarios of mating bias by distance with increasingly more random mating to the right of the  $x$ -axis.

We then explored isolation by distance due to continuous geography as a potentially common mechanism that could create positive LD in a similar way to admixture. Using SLiM to model populations on a continuous 2D landscape we again readily observed positive LD forming among neutral mutations under several scenarios of distance-biased mate choice, demonstrating that spatial considerations alone might be able to explain patterns of positive LD in our two datasets (Figure 2B).

Our simulation results qualitatively match the earlier simulation results reported by Sohail et al. who examined models specific to human demographic history (i.e., population structure and gene flow). They found positive LD does not build uniformly for deleterious and neutral mutations, rather, the more deleterious a class of mutations, the less positive LD built up among them. In summary, all of these simulations clearly show



171 that spatial structure with gene flow or admixture creates a difference in LD for selected  
172 versus neutral sites.

173         While our patterns overall seem consistent with a relatively simple model of  
174 spatial structure with varying strengths of purifying selection across site types, some of  
175 our point estimates of LD for LOFs were negative, and negative LD is not expected  
176 under such models of gene flow. Rather negative LD could be indicative of synergistic  
177 epistasis or Hill-Robertson interference. To assess whether these processes might be  
178 creating negative LD in our datasets, we next tested whether our estimates of negative  
179 LD were significantly different from zero. We did this by permuting the assignment of  
180 LOFs among all individuals in each dataset. This method preserves the allele frequency  
181 at each locus while randomizing the associations among loci. We focused exclusively  
182 on LOF mutations at an allele count cut off of no more than 5 because this cut-off  
183 resulted in the most negative point estimates of mean LD in both datasets and such rare  
184 mutations are more likely to be truly deleterious. All our subsequent analyses utilize this  
185 allelic cut-off value for both datasets. This test suggested that LD among LOF mutations  
186 was not significantly different from 0 in either *C. grandiflora* or *D. melanogaster* when  
187 calculating LD SNP-by-SNP ( $p = 0.996$  and  $p = 0.386$ , 2-tailed) or among sites in  
188 different 100kb blocks ( $p = 0.680$  and  $p = 0.346$ , 2-tailed). When we applied this  
189 permutation approach to synonymous mutations, we found that LD was significantly  
190 greater than 0 in both species, when calculating LD SNP-by-SNP ( $p < 0.002$  both  
191 species, 2-tailed), or using 100kb blocks ( $p < 0.002$  both species, 2-tailed), further  
192 verifying positive LD among more neutral mutations. Again, removing regions with  
193 segregating inversions did not qualitatively change the results in *D. melanogaster* for  
194 LOF mutations ( $p = 0.658$ ,  $p = 0.648$ , LD calculated SNP-by-SNP and using 100kb  
195 blocks respectively), or synonymous mutations ( $p < 0.002$ , for both types of LD  
196 estimates).

197         In the preceding sections, we examined genome-wide average LD. However,  
198 most pairs of sites contributing to this average are far apart or are found on different  
199 chromosomes. For such sites, meiotic recombination and segregation will very rapidly  
200 destroy any allelic associations formed by processes like selection. Significant signed

201 LD however, could still be present between mutations that are physically proximal. We  
202 therefore next used PLINK (Purcell et al. 2007) to assess the relationship between inter-  
203 mutation distance and LD for each class of mutations. Consistent with our first analysis,  
204 LD was positive for all mutation classes in most distance bins; those estimates that  
205 were negative were small in magnitude and were not significantly different from zero  
206 (Figure 2). Within a distance bin, positive LD was stronger for the most weakly selected  
207 mutation classes for most distance bins.

208 An interesting exception to this pattern in both species was in the smallest  
209 distance bin (0-100bp). The major outlier in this distance bin were LOF mutations which  
210 had surprisingly positive mean LD estimates in both species. The confidence intervals  
211 on these estimates were very large for LOF mutations in this distance bin due to the  
212 small number of observations for the mutation class. However, the high LD estimate for  
213 LOFs is present in both species, and, in *C. grandiflora*, the 95% confidence intervals  
214 suggested LOF mutations had more positive LD than all other mutation types aside from  
215 intronic and synonymous. This pattern is consistent with intragenic antagonistic  
216 epistasis, which seems probable for true LOF mutations occurring within the same  
217 gene. Ideally, we would evaluate this hypothesis by comparing LD between physically  
218 close LOFs that occur in the same versus different genes. However, we had too few  
219 intergenic LOFs at short distances to do so.

220 Within gene antagonistic epistasis could also create positive LD among other  
221 types of deleterious mutations such as missense mutations, which are much more  
222 abundant. We compared signed LD decay within and between genes for both  
223 synonymous and non-radical missense mutations (the two coding classes with ample  
224 data) to test for this. In the case of *D. melanogaster*, we did not observe any major  
225 differences in LD decay within vs. between genes for either mutational class (Figure 3D,  
226 Supplementary Figure 5). In *C. grandiflora*, however, we observed significantly higher  
227 LD for within gene pairs of mutations compared to between genes pairs for both non-  
228 radical missense mutations and synonymous mutations (Figure 3C). Higher intra-gene  
229 LD was also evident if we calculated unsigned ( $r^2$ ) LD for *C. grandiflora* hinting at  
230 potential differences in recombination leading to faster LD decay between genes rather

231 than LD created by epistasis (Supplementary Figure 6). Given that unsigned LD decay  
232 should mostly be driven by the rate of recombination, we hypothesize this difference in  
233 inter- vs intragenic LD is due to the strong enrichment of cross-overs in promoter  
234 regions of plant genomes (Choi et al. 2013; Hellsten et al. 2013). Such crossovers  
235 should rapidly erode LD between genes, while leaving within gene LD unaffected.  
236 Conversely, no such pattern is known to occur in flies where transcription start sites  
237 have actually been found to negatively correlate with cross-over occurrence (Comeron  
238 et al. 2012; Smukowski Heil et al. 2015).

239

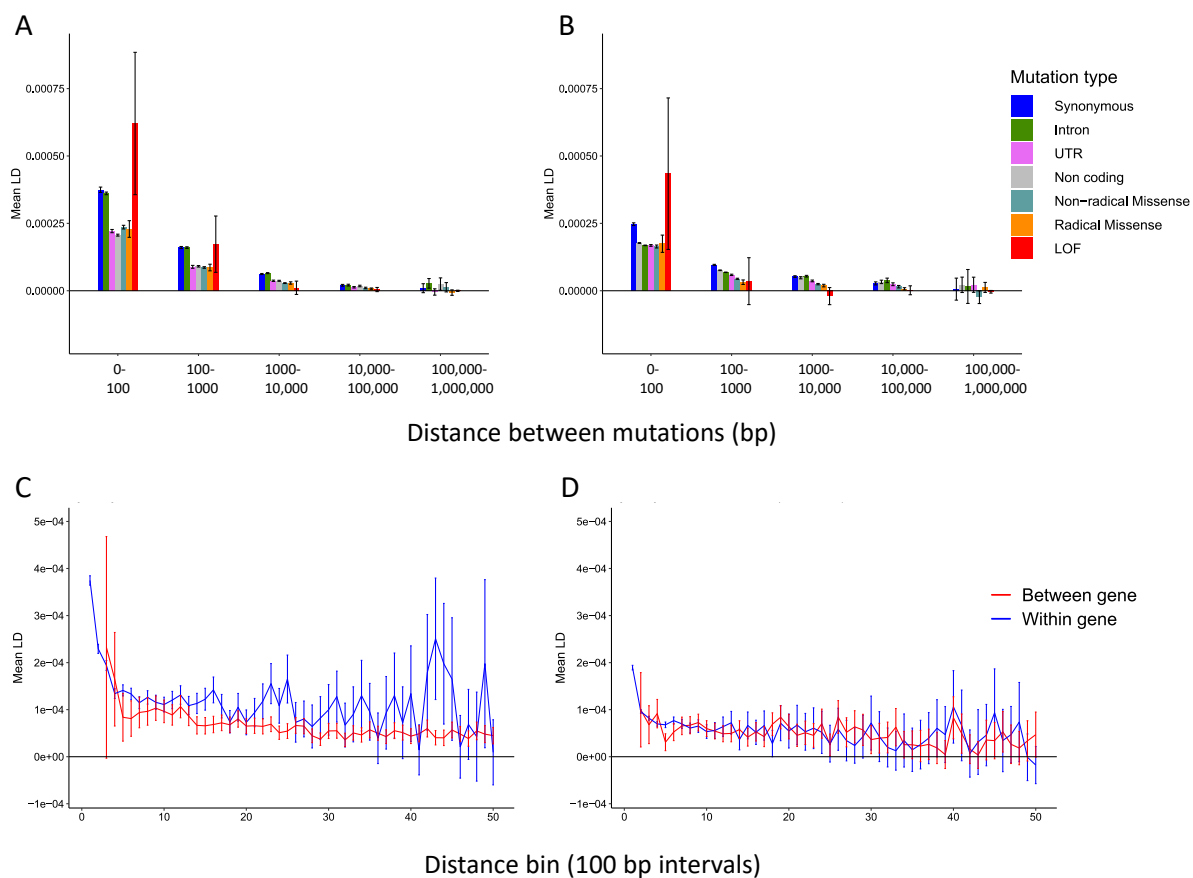

240

241 Figure 3. A,B. Distribution of mean signed LD for pairs of mutations across different distance bins for  
242 several mutation classes in A) *C. grandiflora* and B) *D. melanogaster*. Mutations within each bin are  
243 sorted by degree of expected deleteriousness in ascending order. C,D Mean signed LD in 100bp bins for  
244 synonymous mutation pairs within and between genes for C) *C. grandiflora* and D) *D. melanogaster*.

245

246            Though our previous analyses found no obvious signature of pervasive intergenic  
247 synergistic epistasis when considering the entire genome, epistasis may be stronger  
248 between functionally related genes. To investigate this possibility, we examined LD  
249 among variants within interacting gene networks, using either radical missense or  
250 synonymous mutations. We obtained gene lists of metabolic and signalling networks  
251 from KEGG and only considered LD calculated among sites in different 100kb blocks to  
252 minimize any contribution of LD between nearby mutations and to remove  
253 measurements of LD between mutations within genes. We calculated the mean LD  
254 within each network, then averaged these mean LD values across networks (weighting  
255 by network size) to estimate “average network LD”. We permuted the assignment of  
256 genes to each KEGG network 1000x to create a null distribution for average network  
257 LD.

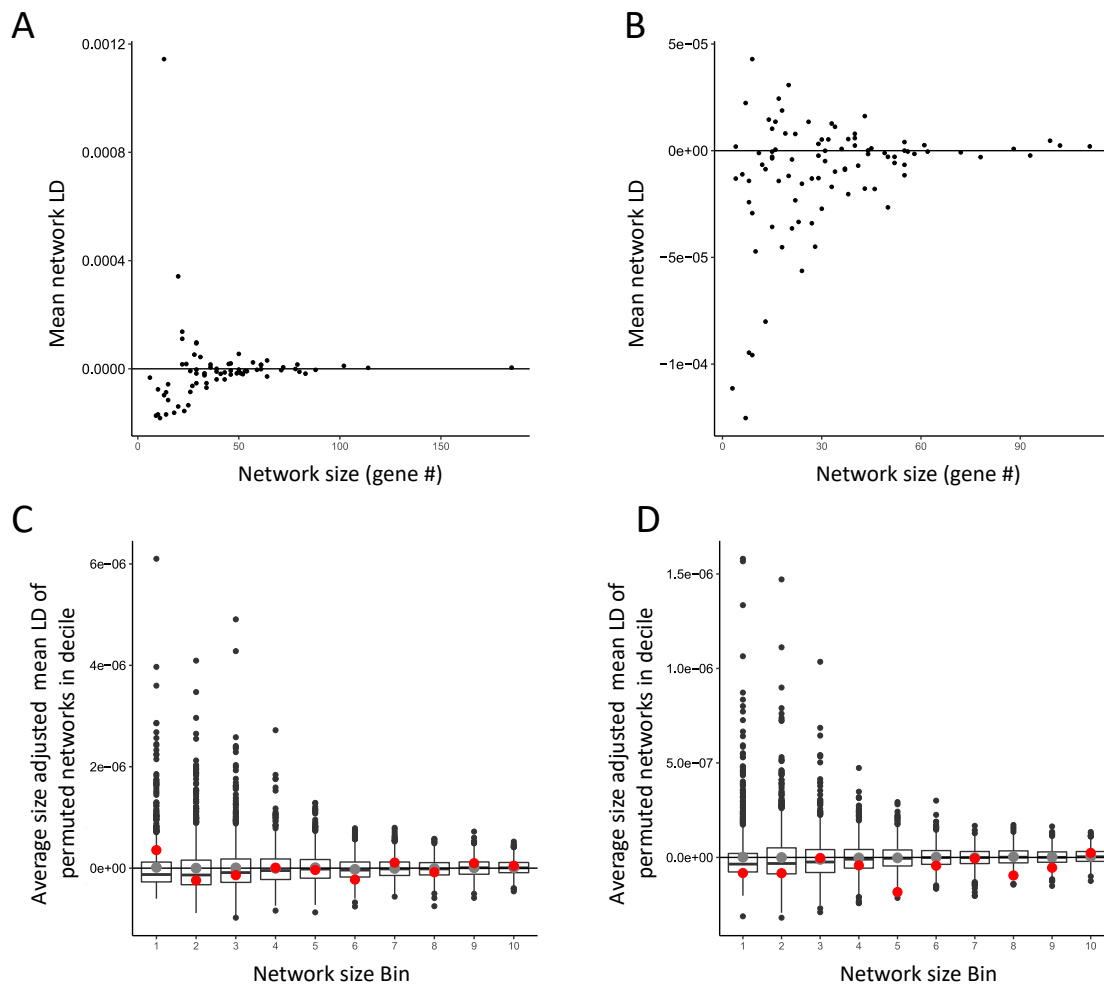

258

259 Figure 4. Mean LD among radical missense mutations affecting genes within interacting biological  
260 networks plotted against network size (as defined by numbers of genes within each network). LD was  
261 calculated among sites in different 100kb blocks to minimize the effects of short intra-genic interactions.  
262 Left data from *C. grandiflora*, right from *D. melanogaster*. C,D) Average network LD among radical  
263 missense mutations for deciles based on network size; LD values were weighted by network size. Box-  
264 plots show the null distribution for average network LD from permuted networks; black bar represents the  
265 median, the grey point represents the mean, and whiskers represent quartiles. In each permutation,  
266 networks were split into deciles based on bin size and the average LD of all networks in each decile was  
267 calculated. True average network LD of each decile is overlaid in red. Left data from *C. grandiflora*, right  
268 from *D. melanogaster*

269

270 The mean LD of radical missense mutations within each network is shown in Figures  
271 4A, B. Permutation tests indicated that the average network LD was significantly more  
272 negative than expected in *D. melanogaster* (average network LD =  $-5.71E-08$ ,  $p =$   
273  $0.008$ ) but not in *C. grandiflora* (average network LD =  $-1.05E-08$ ,  $p = 0.956$ ). Figures  
274 3A, B give the appearance that LD is related to network size but this is likely a statistical  
275 artifact that also occurs in permutations. To visualize this, we split networks into deciles  
276 with respect to network size and calculated average network LD for each decile. The  
277 permutation distributions had negative median values that approach zero for larger  
278 network sizes (Figures 3C, D). Overlaying the observed values on these permutation  
279 distributions helps visualize that the observed LD in *D. melanogaster* is more negative  
280 than expected across most network sizes (red points are empirical values and grey  
281 points are means from the distribution of permutation values). Repeating the  
282 permutation analysis with synonymous mutations, we found that average network LD  
283 was again significantly more negative than expected in *D. melanogaster* (average  
284 network LD =  $-1.03E-08$ ,  $p = 0.006$ ) but not *C. grandiflora* (average network LD =  $9.89E-$   
285  $09$ ,  $p = 0.902$ , see also Supplementary Figure 7 and Supplementary Table 2). Though  
286 the point estimate of LD is more strongly negative for radical missense than  
287 synonymous mutations in *D. melanogaster*, the qualitatively similar pattern complicates  
288 the interpretation (see Discussion).

289

## 290 Discussion

291 In this study we analyzed patterns of signed LD in two species, *C. grandiflora* and *D.*  
292 *melanogaster*. When calculating mean LD among various classes of mutations, we  
293 found that less deleterious mutations tended to have more positive LD, with only LOF  
294 mutations exhibiting negative point estimates of mean LD under certain allelic-count cut-  
295 offs. Though the reduction in LD for deleterious classes such as LOF mutations relative  
296 to putatively neutral ones (e.g., synonymous mutations) could be interpreted as  
297 evidence of negative synergistic epistasis (Sohail et al. 2017) or Hill-Robertson  
298 interference (Garcia and Lohmueller 2020), other processes may provide more  
299 parsimonious alternatives. In particular, positive LD could be created by processes such  
300 as low level admixture in our datasets (Pfaff et al. 2001), and this effect may be weaker  
301 for more deleterious variants. For neutral sites, admixture can generate positive LD if  
302 LD is polarized either by rarity (as we have done) or by ancestral state if a minor allele  
303 threshold is imposed. Simulations across a range of demographic scenarios (both our  
304 own and those of Sohail et al.) have shown that positive LD builds up between  
305 mutations in a manner dependent on their selection coefficient; the more deleterious the  
306 mutations, the less positive LD builds up among them (Sohail et al. 2017), under a  
307 multiplicative model of negative selection. Presumably, the reason that positive LD  
308 occurs for low frequency neutral but less so for selected SNPs is as follows. Low  
309 frequency neutral SNPs within a given region will tend to be of two types: local variants  
310 of relatively recent origin but also migrant variants (of older origin), which will have come  
311 to the local population linked to migrant variants at other genomic sites (i.e., in positive  
312 LD). Deleterious variants are less likely to be of older (migrant) origin by virtue of the  
313 selection against them. Good (2020) showed that even without admixture, positive LD is  
314 expected between rare neutral mutations. This positive LD occurs because some  
315 variants that are rare in the present will have been more common in the past, providing  
316 an opportunity for a second variant to arise on the same haplotype. Positive LD is less  
317 likely to arise in this manner between deleterious variants because a deleterious variant  
318 is less likely to have been at higher frequency in the past. Though positive LD can arise  
319 in this fashion at both neutral and selected sites, admixture (including subtle forms of  
320 geographic structure) can potentially cause much stronger positive LD (Figure 2).

321 Part of our signal of genome-wide positive LD could be explained by the  
322 presence of multinucleotide mutations (Schridder et al. 2011; Ragsdale 2021).  
323 Multinucleotide mutations create strong positive LD among de-novo mutations, and  
324 such coupled mutations should persist much longer if both variants are neutral,  
325 potentially creating our observed pattern of an excess of positive LD for less deleterious  
326 mutations. However, previous work in humans has suggested that the majority of SNPs  
327 in multinucleotide mutations fall within 20bp of each other, which should create signed  
328 LD on a much smaller scale than what we have observed in our data (Schridder et al.  
329 2011). Our genome-wide measures of LD are not driven exclusively by nearby sites; the  
330 LD measures are similarly positive even when we measure LD among sites in different  
331 100kb blocks, thereby excluding the contribution of LD from the vast majority of  
332 neighbouring sites (Figure 1).

333 The fact that differences in LD between selected and neutral sites can arise in  
334 several simple models necessitates caution in interpreting differences in LD among  
335 mutation classes with varying deleteriousness. For example, previous studies have  
336 used LD among synonymous mutations as a control group for inferring synergistic  
337 epistasis (Sohail et al. 2017) or Hill-Robertson interference (Garcia and Lohmueller  
338 2020). However, as outlined above, differences in LD for deleterious versus neutral  
339 mutations may be expected even under purely multiplicative selection, even without  
340 invoking selective interference.

341 Because of its importance in theoretical population genetics (Kimura and  
342 Maruyama 1966; Crow and Kimura 1970; Crow and Kimura 1979; Kondrashov 1982;  
343 Barton 1995), we were particularly interested in looking for evidence of synergistic  
344 epistasis in the form of negative LD at selected sites. Instead of comparing LD at  
345 selected and neutral sites, we used randomization tests to test whether negative LD  
346 among LOF mutations is significantly different from 0; it is not in either species. This  
347 approach is somewhat conservative, because processes like admixture may oppose the  
348 signal of negative LD created by synergistic epistasis. However, because the admixture  
349 effect should be minimal for the most deleterious classes of mutations, this may not  
350 pose a major limitation in searching for a signature of negative epistasis. The power of



351 recombination to destroy associations built by selection is likely a much more severe  
352 limitation on synergistic epistasis—if it is common—creating a detectable signature on  
353 genome-wide LD.

354         An additional issue with estimating mean LD across all genes is that this  
355 averaging may hide meaningful variation. For example, epistasis between functional  
356 sites within a gene may be fundamentally different in strength and/or sign than  
357 intergenic epistasis. Moreover, physically close site pairs, which will often be intragenic,  
358 will be less affected by recombination's power to destroy associations built by epistatic  
359 selection or Hill-Robertson interference. We visualised the distribution of LD among  
360 several classes of mutations in both datasets, split across bins of inter-mutation  
361 distance. We observed non-zero LD most readily for nearby mutations across all  
362 mutation classes, and in all cases it was significantly positive. Excluding the first  
363 distance bin in our analysis (1-100bp), the magnitude of positive LD present in each  
364 mutation class was predicted well by the expected deleteriousness of each type of  
365 mutation. This is pattern can be explained by the simple scenarios of positive LD build-  
366 up outlined above.

367         One notable deviation from the pattern of stronger positive LD for less  
368 deleterious mutation classes was that, in first distance bin, LOF mutations had the most  
369 positive point estimates of mean LD. We hypothesize that this pattern is due to within-  
370 gene antagonistic epistasis, which is to be expected if a single LOF mutation is indeed  
371 sufficient to knock out the function of a gene. This echoes similar findings from Puchta  
372 et al. 2016 who demonstrated that antagonistic epistasis within a yeast snoRNA was  
373 prevalent among large effect deleterious mutations occurring within conserved domains  
374 because such mutations effectively acted as LOF variants and thus did not impact  
375 fitness multiplicatively when combined with other deleterious mutations. Ragsdale  
376 (2021) showed that LD for missense mutations within human protein functional domains  
377 is significantly more positive than expected, also hinting at a potential signal of within  
378 gene antagonistic epistasis.

379         Aside from within-gene epistasis, epistatic interactions may be stronger or more  
380 frequent between mutations in functionally related genes. In particular, given that genes



381 function as part of larger biological networks, negative epistasis may arise between  
382 deleterious mutations that affect the function of genes within the same networks (Chiu  
383 et al. 2012). To test this idea, we calculated mean LD among synonymous and among  
384 radical missense mutations present in genes within interacting biological networks  
385 defined by KEGG (Kanehisa et al. 2016). Permutation tests in *D. melanogaster*  
386 suggested that the observed intra-network LD among radical missense mutations was  
387 more negative than expected. Curiously, significantly negative network LD occurs for  
388 synonymous mutations too. This latter result is surprising for two reasons: (i) LD is  
389 (relatively) strongly positive for synonymous mutations at the genome-wide level (Figure  
390 1), and (ii) negative epistasis should not affect (putatively neutral) synonymous sites. A  
391 possible explanation of these findings emerges from our suspicion that the overall  
392 genome-wide positive LD is due to processes of admixture and gene flow. The  
393 significantly negative network LD for both synonymous and radical missense mutations  
394 could be due to synergistic epistasis acting against introgressed alleles affecting the  
395 same network. Because introgressed haplotypes will include synonymous and  
396 missense mutations that are all in positive LD, selection on deleterious missense  
397 variants will lead to a drop in positive LD for multiple types of mutations.

398 Unlike *D. melanogaster*, network LD was not significantly negative in *C.*  
399 *grandiflora*. The lack of a significant result in *C. grandiflora* could be biologically  
400 meaningful or more mundane. For example, KEGG network delineation could be more  
401 biologically meaningful in *D. melanogaster* compared to *C. grandiflora* where network  
402 information has been obtained from a species in a different genus (*Arabidopsis*  
403 *thaliana*). Alternatively, the difference between species could simply be a statistical  
404 artifact (i.e., false positive in *D. melanogaster* or false negative in *C. grandiflora*). Similar  
405 analyses in other species will shed light on whether signed LD is related to network  
406 status.

407 Our examination of LD has revealed variation in the strength and, in some cases,  
408 the direction of signed LD. This variation is affected by several factors including  
409 proximity of sites, putative deleteriousness of mutations, and the functional relationship  
410 among genes. Some, but not all, of the patterns are consistent across two very different

411 species. Some of these patterns can be generated by more than one process and,  
412 consequently, it will be challenging to conclusively prove which processes drive such  
413 patterns. Nonetheless, patterns of LD can serve as one line of evidence for (or against)  
414 particular hypotheses that are investigated using multiple approaches.

415

## 416 **Materials and Methods**

### 417 Population genomics datasets

418 We retrieved data from whole genome sequencing of 182 *C. grandiflora* individuals from  
419 (Josephs et al. 2015) and data for 197 haploid *D. melanogaster* embryos from the  
420 *Drosophila* population genomics project (DPGP3)(Lack et al. 2015). SNP calls  
421 previously generated by Josephs et al. for *C. grandiflora* were provided by Tyler Kent  
422 (personal communication). SNP calls for *D. melanogaster* were downloaded from the  
423 PopFly website (Hervas et al. 2017, <http://popfly.uab.cat/>). Both data sets are a result of  
424 thorough sampling from single populations with low population structure, making them  
425 ideal candidates for detecting signs of epistasis from patterns of LD. To ensure that  
426 recent migrants did not affect our LD analyses we used the R package SNPrelate (Li  
427 2011) to visualize relatedness through PCA between *C. grandiflora* samples. This  
428 revealed six divergent genotypes that we eliminated from our downstream analysis  
429 leaving us with a total of 176 individuals. A previous study by Sohail et al. (2017) had  
430 already used the DPGP3 dataset to analyze patterns of LD so we used the 190  
431 individuals they retained after their filtering in our own analyses. We further filtered both  
432 datasets by only considering bi-allelic sites where all individuals had genotype  
433 information. Following Sohail et al. (2017) we removed SNPs segregating within chemo-  
434 sensory and odorant binding genes in the *D. melanogaster* dataset based on gene lists  
435 obtained from FlyBase (Larkin et al. 2021), though their inclusion has little effect on the  
436 results. One final complication of the *D. melanogaster* dataset is the segregation of  
437 several large-scale inversions in this species. The initial establishment of an inversion  
438 creates some LD. However, gene exchange between chromosomes of different  
439 inversion karyotypes still occurs within inverted regions via double cross-over  
440 recombination events and gene conversion. Indeed, Houle and Márquez (2015) found

441 that LD was only slightly stronger within versus outside LD regions. To the extent  
442 inversions cause a reduction in the effective recombination rate, inversions should  
443 amplify the ability to detect the existing signal of non-zero LD built by other forces (e.g.,  
444 selection, migration). Nonetheless, we repeated the majority of our analyses excluding  
445 regions known to harbor inversions in the DPGP3 population. We obtained coordinates  
446 of such inversions from Corbett-Detig and Hartl (2012) and removed SNPs segregating  
447 in such regions for a subset of our analyses. However, analyses excluding inverted  
448 regions are necessarily based on much less data and consequently have reduced  
449 power.

450

#### 451 SNP annotation

452 We used SNPeff (Cingolani et al. 2012) and the genome annotations of the reference  
453 genomes (Slotte et al., 2013 for *Capsella rubella*; *D. melanogaster* release 5.57 from  
454 Thurmond et al., 2019) to functionally annotate SNPs in both datasets as either LOF,  
455 synonymous, missense (non-synonymous), intronic (but not splice affecting), UTR (if  
456 the SNP coordinate was either in the 5' or 3' UTR of a gene), or non-coding (for SNPs  
457 not present in coding regions). A small number of SNPs had annotations in multiple  
458 categories (e.g. both UTR and intronic), primarily due to multiple gene overlap, and  
459 were excluded from the analysis. We included stop-gain and splice-disrupting SNPs in  
460 our set of LOF mutations based on the method of Sohail et al. We also further classified  
461 missense SNPs as either radical or non-radical. Missense SNPs were considered  
462 radical if they changed both the volume and polarity of an amino acid based on previous  
463 work suggesting that change in either category lead result in particularly deleterious  
464 mutations in species such as *D. melanogaster* (Sainudiin et al. 2005; Weber and  
465 Whelan 2019, see also Supplementary Table 1 for the list of amino acid properties we  
466 used).

467

#### 468 Calculating LD

469 We calculated LD values in two ways. First, we used the same method as Sohail et al.  
470 by calculating a point estimate of average LD among all mutations. For a genome with  $K$   
471 loci, let  $X_i$  be a discrete, random variable representing the number of derived alleles  
472 present at locus  $i$ , which can take values 0, 1 for a haploid population or alternatively 0,  
473 1, 2 for a diploid population. The variance in the total number of derived mutations  
474 carried by each individual in the population can be expressed as:

475 
$$\text{Var}\left(\sum_{i=1}^K X_i\right) = \sum_{i=1}^K \text{Var}(X_i) + 2 \sum_{i,j}^K \text{Cov}(X_j, X_i)$$

476 Because LD is, by definition, a covariance in the allelic state between two loci, we can  
477 use this equation to estimate the sum of all covariances across all loci by subtracting  
478 first term of the right-hand side from the term on the left-hand side (and then dividing by  
479 2). The term on the left-hand side represents the genome-wide variance in mutation  
480 burden; the first term on the right-hand side is the sum of the variance in mutation  
481 burden at each locus. We can then estimate a mean value of LD per pair of loci by  
482 dividing by the number of possible two-way interactions in the dataset

483 
$$\text{mean LD} = \frac{(\text{Var}(\sum_{i=1}^K X_i) - \sum_{i=1}^K \text{Var}(X_i))}{2 \binom{K}{2}}$$

484 We also modified this approach to calculate LD on a block by block basis instead of  
485 SNP by SNP. This measure of average LD largely eliminates LD between physically  
486 close sites, which could initially arise via random mutation. We first split the genome into  
487 100kb non-overlapping blocks. For a given genotype, we define  $B_g$  as the number of  
488 derived variants in block  $g$ . This new variable can take values from 0 to 2\*(number of  
489 segregating derived alleles in the given genomic block). To calculate total LD among all  
490 blocks, we infer the covariance in mutation burden between all blocks as follows

491 
$$\text{Var}\left(\sum_{g=1}^W B_g\right) = \sum_{g=1}^W \text{Var}(B_g) + 2 \sum_{g,h}^W \text{Cov}(B_g, B_h)$$

492 where  $W$  refers to the total number of 100kb blocks in the genome. Consider for  
493 example the simple case where we compare two blocks ( $B_g, B_h$ ), each with two  
494 segregating sites,  $B$  can be represented as

$$495 \quad B_g = X_1 + X_2, B_h = X_3 + X_4$$

496 The number of covariance terms for these two genomic blocks is

$$497 \quad Cov(B_g, B_h) = Cov(X_1, X_3) + Cov(X_1, X_4) + Cov(X_2, X_3) + Cov(X_2, X_4)$$

498 The within-block LD (e.g.,  $Cov(X_1, X_2)$  and  $Cov(X_3, X_4)$ ) from physically neighbouring  
499 sites contributes to the block-level variances (e.g.,  $Var(B_g)$  and  $Var(B_h)$ ) but not the  
500 between-block covariances. For an arbitrary number of blocks,  $Cov(B_g, B_h)$  can  
501 therefore be standardized per pair of interacting blocks as follows

$$502 \quad mean\ LD_{blocks} = \frac{(Var(\sum_{g=1}^W B_g) - \sum_{g=1}^W Var(B_g))}{2(\sum_{g \neq h}^W \sum_h^W n_g n_h)}$$

503 where  $n_g$  and  $n_h$  represent the number of sites with segregating derived variants in  
504 block  $g$  and  $h$  respectively.

505 We calculated mean LD using the above formula by transforming genotypes in  
506 our VCF files into tables of non-reference allele counts (0, 1, 2 for *C. grandiflora* and 0,  
507 1 for *D. melanogaster*) and calculating the relevant statistics in R using the package  
508 matrixStats (Bengtsson 2017). We assumed that the non-reference alleles were the  
509 derived alleles in the two datasets. In principle, a reference genome assembled from a  
510 randomly sampled haplotype will contain some derived alleles that we will incorrectly  
511 assume are ancestral in our method. This issue however should be minimal since our  
512 analyses exclusively focus on rare mutations (<5% frequency) that are unlikely to be  
513 included in a reference assembly and will be filtered out as high frequency variants by  
514 our analysis even if they are included. This is especially true for most putatively  
515 deleterious mutations such as LOF mutations which are likely maintained at low  
516 frequency by mutation-selection balance.

517 We also calculated LD using PLINK (Purcell et al. 2007) for each category of  
518 mutation. We calculated LD using default PLINK parameters which involved  
519 subsampling LD observations as too many possible pairwise comparisons exist to  
520 reasonably compute the entire distribution of LD values for most classes of mutations.  
521 We estimated raw LD values by first estimating  $r$  between every single pair of mutations  
522 in our dataset in PLINK (using the `--r` option) and then back-calculating a raw value of  
523 LD by multiplying  $r$  by the square root of the product of allele frequencies at the two loci  
524 being compared. This approach allows us to observe the entire distribution of LD values  
525 rather than one summary statistic and back-calculating a raw value of LD from  $r$  allows  
526 us to compare values from our two methods directly. Finally, we binned distance  
527 between mutations pairs into seven categories: 100bp or less, 101-1000bp, 1001-  
528 10,000bp, 10,001-100,000bp, 100,001-1,000,000bp to visualize how signed LD  
529 decayed with distance for each class of mutations. Further, we compared signed LD  
530 decay within vs. between genes for synonymous and non-radical missense mutations.  
531 We did this by noting which gene our mutations of interest impacted according to  
532 SNPeff, and splitting our LD values into two categories, those where both contributing  
533 mutations occurred in the same gene, and those where both contributing mutations  
534 occurred in different genes. We then visualized LD as above, however, we only  
535 considered mutations 1-5000bp apart, and calculated mean LD in even 100bp bins,  
536 excluding any bins with less than 100 pairs of LD values.

537

### 538 Gene network analysis

539 We used the R package Graphite (Sales et al. 2012) to obtain lists of genes from  
540 biological pathways described in the KEGG database (Kanehisa et al. 2016). Network  
541 information from KEGG was directly available for *D. melanogaster* but not for *C.*  
542 *grandiflora* where we instead used network information from *A. thaliana*. We used  
543 information on *C. grandiflora* - *A. thaliana* orthologs from (Josephs et al. 2015) to  
544 generate lists of interacting genes in *C. grandiflora*. Due to the low number of LOF  
545 mutations in each dataset we used low frequency (count of less than 5) radical  
546 missense mutations (definition described in SNP annotation section) as our set of

547 candidate deleterious mutations. We calculated mean LD using 100kb blocks (as  
548 described above) for each network defined by KEGG for our two species, generating  
549 separating sets of networks for synonymous and radical mutations. Smaller networks  
550 (defined by the number of genes assigned by KEGG to each network) have more highly  
551 variable estimates of LD, presumably because of the smaller number of genes from  
552 which LD is estimated. Consequently, we calculated “size adjusted LD” values for all  
553 networks. We did this by correcting mean LD in 100kb blocks for each network as  
554 follows:

$$555 \quad \text{size adjusted LD} = \text{mean LD}_{\text{blocks}} \times \frac{\# \text{ genes in network}}{\# \text{ total genes across all networks}}$$

556

### 557 Simulations

558 We used SLiM (V3.2.1) (Haller and Messer 2019) to run forward time simulations of  
559 population admixture to ask how signed LD can be affected by various demographic  
560 processes. We simulated three populations of 100,000 individuals each: one focal  
561 population that was sampled at the end of the simulation and two satellite populations  
562 with symmetrical migration to the focal population (10,000 individuals per generation).  
563 Each diploid individual in our simulation contained two 1Mb chromosomes with  
564 recombination and mutation rates both 1E-08 per bp per generation. Mutations were  
565 sampled from two categories: neutral ( $s = 0$ ) with a probability 1%, or deleterious ( $s = -$   
566 0.001) with a probability of 99%. Fitness was determined by the multiplicative effect of  
567 deleterious load in each individual genome, dominance was also assumed to be  
568 additive. We ran all simulations for 1.5 million generations altering the generation where  
569 continuous admixture was started in several treatment groups: no admixture, admixture  
570 starting at generation 200,000, 600,000, and 1,300,000. Each treatment group was  
571 made of 20 simulated replicates. After 1.5 million generations, we sampled 100  
572 individuals from the focal population in each replicate. Next, we filtered out recent  
573 migrants in our focal population by performing a PCA on genotype of our samples and  
574 eliminating individuals with PC values greater than 1 SD away from the mean of PC1 or  
575 PC2. This mimics how we treated our real-world data where we eliminated outlier



576 samples using PCA. Next, to replicate how we defined ancestral/derived alleles in the  
577 real-world data, we assigned all mutations with frequencies over 50% in our samples as  
578 the ancestral variant. Finally, we filtered out sites with a ‘derived’ allele count over 5 and  
579 calculated LD separately for neutral and deleterious mutations in each replicate. We  
580 also separately calculated LD for these simulations keeping the true ancestral state  
581 recorded by SLiM and polarizing LD by true ancestral/derived status both with and  
582 without a minor allele count cut-off, mimicking the way LD may be calculated in a real-  
583 world dataset where information on the true ancestral state may be available.

584         We ran a second set of simulations consisting of only one focal population where  
585 individuals were placed on a 2D landscape to simulate the effects of isolation by  
586 distance due to limited dispersal. We used the “Mate choice with a spatial kernel” recipe  
587 provided in the SLiM manual for this set of simulations. Briefly, 10,000 individuals were  
588 randomly placed on an  $(x,y)$  plane, with coordinate ranges  $[0,1]$  for both axes. To avoid  
589 clumping, individual fitness was calculated as a function of spatial competition with  
590 neighbouring individuals exerting the most costs to each other (see SLiM manual for  
591 more details URL: [http://benhaller.com/slim/SLiM\\_Manual.pdf](http://benhaller.com/slim/SLiM_Manual.pdf)). Individuals chose mates  
592 a gaussian-distributed distance away, with mean 0, SD  $\sigma$ , and maximum value  $\tau$ . We  
593 ran simulations with three sets of parameter values for  $\sigma$  and  $\tau$ : (0.1,0.02), (0.3,0.06),  
594 (0.5,0.5). This range of values was selected to explore various levels of bias towards  
595 localized mating much like might occur in plant populations with limited pollen dispersal.  
596 Finally, offspring dispersed a gaussian distance away from their first parent. Each  
597 individual contained two 1Mb chromosomes containing only neutral mutations with a  
598 recombination and mutation rate of  $1E-08$  per bp per generation. The simulations were  
599 terminating after 100,000 generations and 100 individuals were sampled per simulation  
600 replicate. Each mate choice condition was replicated 10 times. After sampling, LD was  
601 calculated as described for the other simulations with the exception of PCA analysis as  
602 no migrant filtering was necessary due to the absence of cross-population migration.

603

604 **Data availability statement**



605 Raw data for *C. grandiflora* are available at NCBI sequencing read archive (bio project  
606 ID: PRJNA275635). Data for *D. melanogaster* were downloaded via the PopFly website  
607 (Hervas et al. 2017, <http://popfly.uab.cat/>). Files containing annotated SNP calls (VCF  
608 format) used in this study will be made publicly available upon acceptance of this  
609 manuscript for publication. Scripts used in this study will also be made available at  
610 <https://github.com/gsan211>.

611

## 612 **Acknowledgements**

613 The authors would like to thank Tyler Kent for helpful discussions and providing  
614 guidance on using *C. grandiflora* population genomic data. This work was supported by  
615 Natural Sciences and Engineering Research Council of Canada (NSERC) Discovery  
616 grants (S.I.W., and A.F.A.) and an NSERC Alexander Graham Bell Canada Graduate  
617 Scholarship (G.S.).

618

## 619 **Author Contributions**

620 All authors designed the research. G.S. performed all analyses and wrote the draft  
621 manuscript. All authors revised the manuscript.

622

## 623 **Competing Interests**

624 The authors have no competing interests to declare

625

## 626 **Literature Cited**

627 Agrawal AF, Whitlock MC. 2010. Environmental duress and epistasis: how does stress  
628 affect the strength of selection on new mutations? *Trends Ecol. Evol.* 25:450–  
629 458.

630 Auton A, McVean G. 2007. Recombination rate estimation in the presence of hotspots.  
631 *Genome Res.* 17:1219–1227.

- 632 Bank C, Hietpas RT, Jensen JD, Bolon DNA. 2015. A Systematic Survey of an  
633 Intragenic Epistatic Landscape. *Mol. Biol. Evol.* 32:229–238.
- 634 Barton NH. 1995. A general model for the evolution of recombination. *Genet. Res.*  
635 65:123–145.
- 636 Chakraborty R, Weiss KM. 1988. Admixture as a tool for finding linked genes and  
637 detecting that difference from allelic association between loci. *Proc. Natl. Acad.*  
638 *Sci.* 85:9119–9123.
- 639 Chiu H-C, Marx CJ, Segrè D. 2012. Epistasis from functional dependence of fitness on  
640 underlying traits. *Proc. R. Soc. B Biol. Sci.* 279:4156–4164.
- 641 Choi K, Zhao X, Kelly KA, Venn O, Higgins JD, Yelina NE, Hardcastle TJ, Ziolkowski  
642 PA, Copenhaver GP, Franklin FCH, et al. 2013. *Arabidopsis* meiotic crossover  
643 hot spots overlap with H2A.Z nucleosomes at gene promoters. *Nat. Genet.*  
644 45:1327–1336.
- 645 Cingolani P, Platts A, Wang LL, Coon M, Nguyen T, Wang L, Land SJ, Lu X, Ruden  
646 DM. 2012. A program for annotating and predicting the effects of single  
647 nucleotide polymorphisms, SnpEff. *Fly* 6:80–92.
- 648 Comeron JM, Ratnappan R, Bailin S. 2012. The Many Landscapes of Recombination in  
649 *Drosophila melanogaster*. *PLOS Genet.* 8:e1002905.
- 650 Corbett-Detig RB, Hartl DL. 2012. Population Genomics of Inversion Polymorphisms in  
651 *Drosophila melanogaster*. *PLOS Genet.* 8:e1003056.
- 652 Crow JF, Kimura M. 1970. An introduction to population genetics theory. *Introd. Popul.*  
653 *Genet. Theory* Ney York: Harper & Row
- 654 Crow JF, Kimura M. 1979. Efficiency of truncation selection. *Proc. Natl. Acad. Sci.*  
655 76:396–399.
- 656 Elena SF, Lenski RE. 1997. Test of synergistic interactions among deleterious  
657 mutations in bacteria. *Nature* 390:395–398.
- 658 Good BH. 2020. Linkage disequilibrium between rare mutations.  
659 <https://www.biorxiv.org/content/10.1101/2020.12.10.420042v1.full>
- 660 Garcia JA, Lohmueller KE. 2020. Negative linkage disequilibrium between amino acid  
661 changing variants reveals interference among deleterious mutations in the  
662 human genome  
663 <https://www.biorxiv.org/content/10.1101/2020.01.15.907097v1.full>
- 664 Haller BC, Messer PW. 2019. SLiM 3: Forward Genetic Simulations Beyond the Wright–  
665 Fisher Model. *Mol. Biol. Evol.* 36:632–637.

- 666 Hellsten U, Wright KM, Jenkins J, Shu S, Yuan Y, Wessler SR, Schmutz J, Willis JH,  
667 Rokhsar DS. 2013. Fine-scale variation in meiotic recombination in *Mimulus*  
668 inferred from population shotgun sequencing. *Proc. Natl. Acad. Sci.* 110:19478–  
669 19482.
- 670 Hill WG, Robertson A. 1966. The effect of linkage on limits to artificial selection. *Genet.*  
671 *Res.* 8:269–294.
- 672 Hill WG, Robertson A. 1968. Linkage disequilibrium in finite populations. *Theor. Appl.*  
673 *Genet.* 38:226–231.
- 674 Houle D, Márquez EJ. 2015. Linkage Disequilibrium and Inversion-Typing of the  
675 *Drosophila melanogaster* Genome Reference Panel. *G3 Genes Genomes Genet.*  
676 5:1695–1701.
- 677 Josephs EB, Lee YW, Stinchcombe JR, Wright SI. 2015. Association mapping reveals  
678 the role of purifying selection in the maintenance of genomic variation in gene  
679 expression. *Proc. Natl. Acad. Sci.* 112:15390–15395.
- 680 Kanehisa M, Sato Y, Kawashima M, Furumichi M, Tanabe M. 2016. KEGG as a  
681 reference resource for gene and protein annotation. *Nucleic Acids Res.*  
682 44:D457–D462.
- 683 Kimura M, Maruyama T. 1966. The Mutational Load with Epistatic Gene Interactions in  
684 Fitness. *Genetics* 54:1337–1351.
- 685 Kondrashov AS. 1982. Selection against harmful mutations in large sexual and asexual  
686 populations. *Genet. Res.* 40:325–332.
- 687 Kondrashov AS. 1995. Dynamics of unconditionally deleterious mutations: Gaussian  
688 approximation and soft selection. *Genet. Res.* 65:113–121.
- 689 Lack JB, Cardeno CM, Crepeau MW, Taylor W, Corbett-Detig RB, Stevens KA, Langley  
690 CH, Pool JE. 2015. The *Drosophila* Genome Nexus: A Population Genomic  
691 Resource of 623 *Drosophila melanogaster* Genomes, Including 197 from a  
692 Single Ancestral Range Population. *Genetics* 199:1229–1241.
- 693 Lalić J, Elena SF. 2012. Magnitude and sign epistasis among deleterious mutations in a  
694 positive-sense plant RNA virus. *Heredity* 109:71–77.
- 695 Larkin A, Marygold SJ, Antonazzo G, Attrill H, dos Santos G, Garapati PV, Goodman  
696 JL, Gramates LS, Millburn G, Strelets VB, et al. 2021. FlyBase: updates to the  
697 *Drosophila melanogaster* knowledge base. *Nucleic Acids Res.* 49:D899–D907.
- 698 Li H. 2011. A statistical framework for SNP calling, mutation discovery, association  
699 mapping and population genetical parameter estimation from sequencing data.  
700 *Bioinforma. Oxf. Engl.* 27:2987–2993.

- 701 McEvoy BP, Powell JE, Goddard ME, Visscher PM. 2011. Human population dispersal  
702 “Out of Africa” estimated from linkage disequilibrium and allele frequencies of  
703 SNPs. *Genome Res.* 21:821–829.
- 704 McVean G. 2007. The Structure of Linkage Disequilibrium Around a Selective Sweep.  
705 *Genetics* 175:1395–1406.
- 706 Pfaff CL, Parra EJ, Bonilla C, Hiester K, McKeigue PM, Kamboh MI, Hutchinson RG,  
707 Ferrell RE, Boerwinkle E, Shriver MD. 2001. Population structure in admixed  
708 populations: effect of admixture dynamics on the pattern of linkage  
709 disequilibrium. *Am. J. Hum. Genet.* 68:198–207.
- 710 Puchta O, Cseke B, Czaja H, Tollervey D, Sanguinetti G, Kudla G. 2016. Network of  
711 epistatic interactions within a yeast snoRNA. *Science* 352:840–844.
- 712 Purcell S, Neale B, Todd-Brown K, Thomas L, Ferreira MAR, Bender D, Maller J, Sklar  
713 P, de Bakker PIW, Daly MJ, et al. 2007. PLINK: A Tool Set for Whole-Genome  
714 Association and Population-Based Linkage Analyses. *Am. J. Hum. Genet.*  
715 81:559–575.
- 716 Ragsdale AP. 2021. Can we distinguish modes of selective interactions using linkage  
717 disequilibrium?  
718 bioRxiv:2021.03.25.437004.
- 719 Sainudiin R, Wong WSW, Yogeewaran K, Nasrallah JB, Yang Z, Nielsen R. 2005.  
720 Detecting Site-Specific Physicochemical Selective Pressures: Applications to the  
721 Class I HLA of the Human Major Histocompatibility Complex and the SRK of the  
722 Plant Sporophytic Self-Incompatibility System. *J. Mol. Evol.* 60:315–326.
- 723 Sales G, Calura E, Cavalieri D, Romualdi C. 2012. graphite - a Bioconductor package to  
724 convert pathway topology to gene network. *BMC Bioinformatics* 13:20.
- 725 Schrider DR, Hourmozdi JN, Hahn MW. 2011. Pervasive Multinucleotide Mutational  
726 Events in Eukaryotes. *Curr. Biol.* 21:1051–1054.
- 727 Slotte T, Hazzouri KM, Ågren JA, Koenig D, Maumus F, Guo Y-L, Steige K, Platts AE,  
728 Escobar JS, Newman LK, et al. 2013. The *Capsella rubella* genome and the  
729 genomic consequences of rapid mating system evolution. *Nat. Genet.* 45:831–  
730 835.
- 731 Smukowski Heil CS, Ellison C, Dubin M, Noor MAF. 2015. Recombining without  
732 Hotspots: A Comprehensive Evolutionary Portrait of Recombination in Two  
733 Closely Related Species of *Drosophila*. *Genome Biol. Evol.* 7:2829–2842.
- 734 Sohail M, Vakhrusheva OA, Sul JH, Pulit SL, Francioli LC, Consortium G of the N,  
735 Initiative ADN, Berg LH van den, Veldink JH, Bakker PIW de, et al. 2017.  
736 Negative selection in humans and fruit flies involves synergistic epistasis.  
737 *Science* 356:539–542.

- 738 Stephens JC, Briscoe D, O'Brien SJ. 1994. Mapping by admixture linkage disequilibrium  
739 in human populations: limits and guidelines. *Am. J. Hum. Genet.* 55:809–824.
- 740 Thurmond J, Goodman JL, Strelets VB, Attrill H, Gramates LS, Marygold SJ, Matthews  
741 BB, Millburn G, Antonazzo G, Trovisco V, et al. 2019. FlyBase 2.0: the next  
742 generation. *Nucleic Acids Res.* 47:D759–D765.
- 743 Weber CC, Whelan S. 2019. Physicochemical Amino Acid Properties Better Describe  
744 Substitution Rates in Large Populations. *Mol. Biol. Evol.* 36:679–690.
- 745
- 746
- 747
- 748
- 749
- 750
- 751
- 752
- 753
- 754
- 755
- 756
